# Supplementary material for: ADAM8 expression in invasive breast cancer promotes tumor dissemination and metastasis
Source: PubMed Central journal article supplement (PMC3927960; doi:10.1002/emmm.201303373), 2013-12-27
Supplement: emmm0006-0278-sd1.pdf [file emmm0006-0278-sd1.pdf]

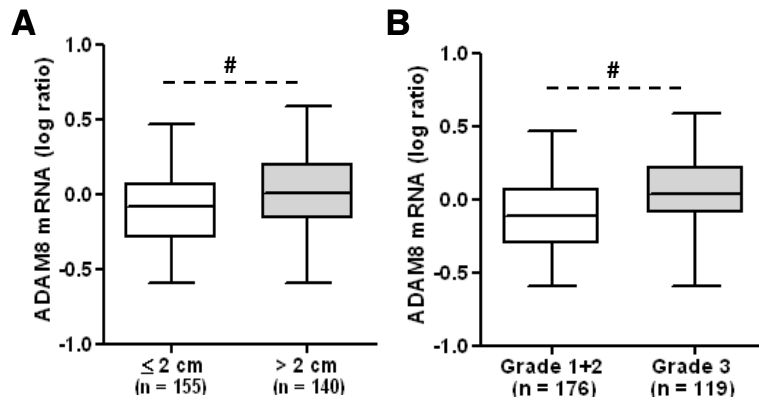

**Supplementary Fig S1. *ADAM8* mRNA levels correlate with clinicopathological variables of human breast tumors.**

**(A-B)** The van de Vijver microarray dataset (van de Vijver et al, 2002) was used to compare *ADAM8* mRNA levels and clinicopathological features of 295 human breast tumors: size (A) and grade (B). #*P* = 0.001, Mann-Whitney *U* test.
