# Supplementary material for: ADAM8 expression in invasive breast cancer promotes tumor dissemination and metastasis
Source: PubMed Central journal article supplement (PMC3927960; doi:10.1002/emmm.201303373), 2013-12-27
Supplement: emmm0006-0278-sd3.pdf [file emmm0006-0278-sd3.pdf]

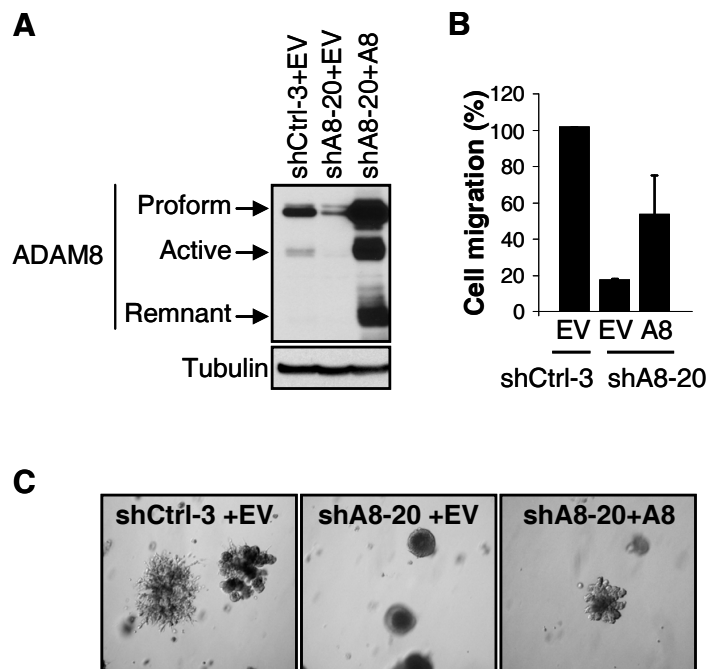

**Supplementary Fig S3. Ectopic ADAM8 expression rescues the invasive phenotype of stable ADAM8 knockdown cells.**

ADAM8 (A8) or empty vector (EV) DNA was transiently transfected into shA8-20 MDA-MB-231 cells for 24 h.

**(A)** WCEs were isolated and subjected to Western blot analysis for ADAM8 (LSBio antibody) and Tubulin.

**(B-C)** Migration and Matrigel outgrowth assays were performed as described in Figures 3C and 3D, respectively. Ectopic expression of ADAM8 in shA8-20 cells partially rescued their ability to migrate (B) and to form invasive colonies (C), consistent with the observed transfection efficiency of ~40%.
