# Supplementary material for: ADAM8 expression in invasive breast cancer promotes tumor dissemination and metastasis
Source: PubMed Central journal article supplement (PMC3927960; doi:10.1002/emmm.201303373), 2013-12-27
Supplement: emmm0006-0278-sd5.pdf [file emmm0006-0278-sd5.pdf]

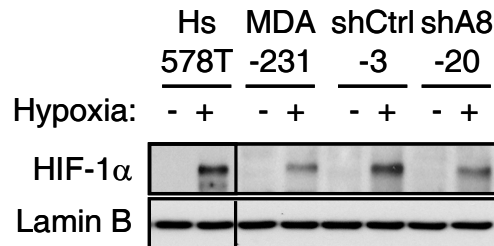

**Supplemental Fig S5. HIF-1 $\alpha$  is induced in breast cancer cell lines under hypoxia.**

Cells were incubated for 8 h under hypoxic conditions and nuclear extracts were subjected to Western blotting analysis for HIF-1 $\alpha$  (Novus Biologicals, NB100-105) and Lamin B (Santa Cruz Biotechnology, sc-6217). All lanes were from the same gel, but two different times of exposure were used for the Hs578T cells (5 min) vs the MDA-MB-231-derived lines (30 min), as indicated by the vertical line.
