# Supplementary material for: ADAM8 expression in invasive breast cancer promotes tumor dissemination and metastasis
Source: PubMed Central journal article supplement (PMC3927960; doi:10.1002/emmm.201303373), 2013-12-27
Supplement: emmm0006-0278-sd7.pdf [file emmm0006-0278-sd7.pdf]

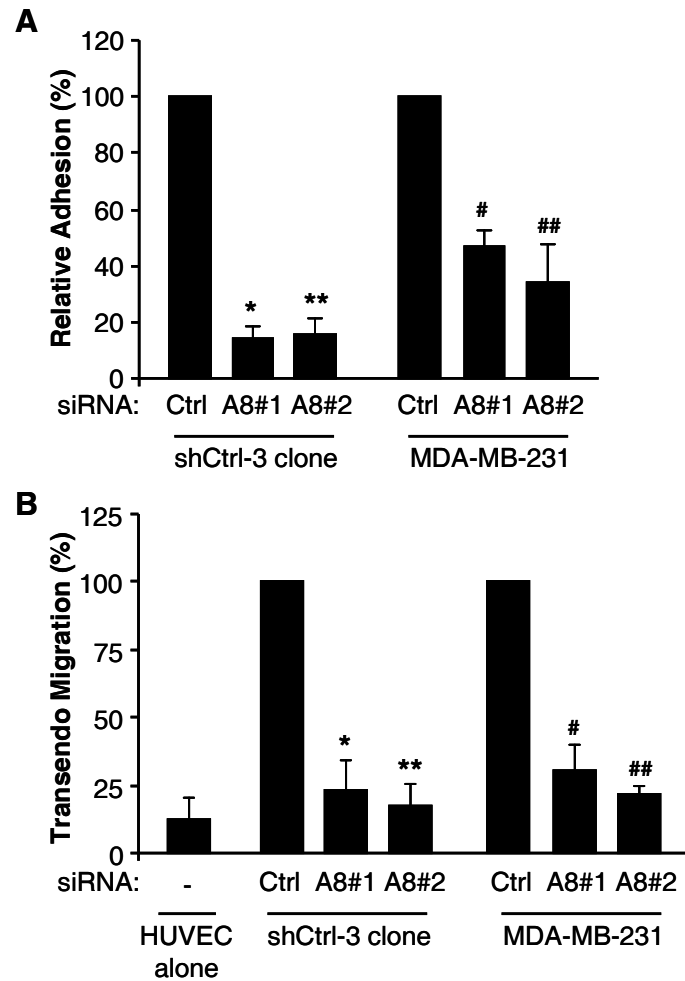

**Supplementary Fig S7. siRNA-mediated knockdown of ADAM8 in MDA-MB-231 cells reduces their ability to adhere to and transmigrate through HUVECs.**

(A-B) The MDA-MB-231-derived shCtrl-3 clone and the total MDA-MB-231 population were transfected with either *Control* siRNA (siCtrl) or two specific *ADAM8* siRNAs (siA8) for 72 h. Cancer cell adhesion to (A) and transendothelial migration through (B) HUVECs were assessed as in Figure 6B and 6C, respectively. \* $P = 0.001$ , \*\* $P = 0.001$ , # $P = 0.005$ , ## $P = 0.005$ , Student's  $t$  test,  $n = 2$  (A). \* $P = 0.008$ , \*\* $P = 5.9E-4$ , # $P = 0.009$ , ## $P = 6.6E-4$ , Student's  $t$  test,  $n = 2$  (B).
