# Supplementary material for: ADAM8 expression in invasive breast cancer promotes tumor dissemination and metastasis
Source: PubMed Central journal article supplement (PMC3927960; doi:10.1002/emmm.201303373), 2013-12-27
Supplement: emmm0006-0278-sd8.pdf [file emmm0006-0278-sd8.pdf]

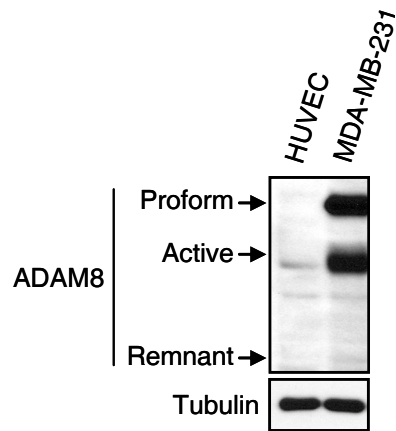

**Supplemental Fig S8. ADAM8 is not detected in HUVECs.**

WCEs from HUVECs and MDA-MB-231 cells, as a positive control for ADAM8 expression, were subjected to Western blotting for ADAM8 (LSBio antibody) and Tubulin.
