# Supplementary material for: ADAM8 expression in invasive breast cancer promotes tumor dissemination and metastasis
Source: PubMed Central journal article supplement (PMC3927960; doi:10.1002/emmm.201303373), 2013-12-27
Supplement: emmm0006-0278-sd10.pdf [file emmm0006-0278-sd10.pdf]

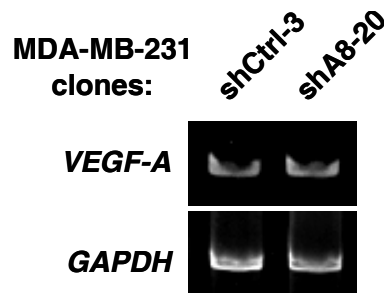

**Supplementary Fig S10. *VEGF-A* mRNA levels are unchanged in stable ADAM8 knockdown cells.**

RNA was isolated using NucleoSpin RNA II (Macherey-Nagel) according to the manufacturer's protocol and quantified by measuring the  $A_{260}$ . For reverse transcription-PCR (RT-PCR), 1  $\mu$ g of RNA was reverse transcribed with SuperScript III reverse transcriptase in the presence of 250 ng of random primers (Invitrogen). PCR was performed in a thermal cycler with the following conditions and primer sets:

*VEGF-A* sense: 5'-GCAGAATCATCACGAAGTGG-3'

*VEGF-A* antisense: 5'-GCATGGTGATGTTGGACTCC-3'

95°C for 30 sec, 60°C for 30 sec and 72°C for 45 sec; 24 cycles

*GAPDH* sense: 5'-TCACCATCTTCCAGGAG-3'

*GAPDH* antisense: 5'-GCTTCACCACCTTCTTG-3'

95°C for 30 sec, 55°C for 30 sec and 72°C for 45 sec; 18 cycles
