# Supplementary material for: ADAM8 expression in invasive breast cancer promotes tumor dissemination and metastasis
Source: PubMed Central journal article supplement (PMC3927960; doi:10.1002/emmm.201303373), 2013-12-27
Supplement: emmm0006-0278-sd11.pdf [file emmm0006-0278-sd11.pdf]

**Supplementary Table S1.** Relationship between *ADAM8* mRNA (continuous log ratio levels) and disease-free survival (top table) and overall survival (bottom table) in 295 breast cancer patients. Data was analysed using a multivariate Cox model. CI; Confidence Interval.

|                           | <b>Wald test <i>P</i>-value</b> | <b>Relative Risk</b> | <b>95% CI</b>  |
|---------------------------|---------------------------------|----------------------|----------------|
| Number of positive nodes  | 0.238                           | 1.057                | 0.964 – 1.159  |
| ER Category <sup>1</sup>  | 0.901                           | 0.970                | 0.600 – 1.568  |
| Size (≤ 2cm, > 2 cm)      | 0.044                           | 1.537                | 1.011 – 2.336  |
| Tumour Grade              | 0.004                           | 1.575                | 1.152 – 2.154  |
| HER-2 Status <sup>2</sup> | 0.248                           | 1.333                | 0.879 – 2.171  |
| ADAM-8                    | <b>0.001</b>                    | 4.470                | 1.877 – 10.644 |

|                           | <b>Wald test <i>P</i>-value</b> | <b>Relative Risk</b> | <b>95% CI</b> |
|---------------------------|---------------------------------|----------------------|---------------|
| ER Category <sup>1</sup>  | 0.055                           | 0.607                | 0.365 – 1.011 |
| Tumour size (≤, > 2cm)    | 0.069                           | 1.558                | 0.966 – 2.513 |
| Grade Category            | <b>0.002</b>                    | 1.860                | 1.259 – 2.748 |
| Age (yrs)                 | <b>0.047</b>                    | 0.962                | 0.926 – 0.999 |
| HER-2 Status <sup>2</sup> | 0.132                           | 1.498                | 0.886 – 2.535 |
| ADAM-8                    | <b>0.052</b>                    | 2.707                | 0.992 – 7.384 |

<sup>1</sup> Estrogen Receptor alpha expression, as measured by microarray (van de Vijver et al, 2002)

<sup>2</sup> HER2 status, as determined by microarray (van de Vijver et al, 2002)
