# Supplementary material for: ADAM8 expression in invasive breast cancer promotes tumor dissemination and metastasis
Source: PubMed Central journal article supplement (PMC3927960; doi:10.1002/emmm.201303373), 2013-12-27
Supplement: emmm0006-0278-sd12.pdf [file emmm0006-0278-sd12.pdf]

**Supplementary Table S2.** Clinicopathologic features of the 95 primary breast tumors assayed for ADAM8 protein expression by ELISA (corresponding to Figure 1B).

| <b><i>Tumor characteristic</i></b> | <b><i>N (%)</i></b> |
|------------------------------------|---------------------|
| <b>Age</b>                         |                     |
| ≤ 50 yrs                           | 9 (9.5)             |
| > 50 yrs                           | 85 (89.5)           |
| Unknown                            | 1 (1.1)             |
| <b>Size</b>                        |                     |
| ≤ 2 cm                             | 19 (20.0)           |
| > 2 cm                             | 73 (76.8)           |
| Unknown                            | 3 (3.2)             |
| <b>Grade</b>                       |                     |
| 1 & 2                              | 38 (40.0)           |
| 3                                  | 50 (52.6)           |
| Unknown                            | 7 (7.4)             |
| <b>ER Status</b>                   |                     |
| Negative                           | 30 (31.6)           |
| Positive                           | 60 (63.2)           |
| Unknown                            | 5 (5.2)             |
| <b>PR Status</b>                   |                     |
| Negative                           | 56 (59.0)           |
| Positive                           | 31 (32.6)           |
| Unknown                            | 8 (8.4)             |
| <b>HER2 Status</b>                 |                     |
| Negative                           | 16 (16.8)           |
| Positive                           | 2 (2.1)             |
| Unknown                            | 77 (81.1)           |
| <b>Nodal Status</b>                |                     |
| Negative                           | 33 (34.7)           |
| Positive                           | 58 (61.1)           |
| Unknown                            | 4 (4.2)             |
| <b>Histology</b>                   |                     |
| Ductal                             | 72 (75.8)           |
| Lobular                            | 15 (15.8)           |
| Ductal&Lobular                     | 6 (6.3)             |
| Unknown                            | 2 (2.1)             |
