# Supplementary material for: ADAM8 expression in invasive breast cancer promotes tumor dissemination and metastasis
Source: PubMed Central journal article supplement (PMC3927960; doi:10.1002/emmm.201303373), 2013-12-27
Supplement: emmm0006-0278-sd13.pdf [file emmm0006-0278-sd13.pdf]

**Supplementary Table S3.** Clinical characteristics of the 30 breast cancer sera analyzed by ADAM8 ELISA in this study (corresponding to Figure 1C).

| <b><i>Tumor characteristic</i></b> | <b><i>N (%)</i></b> |
|------------------------------------|---------------------|
| <b>Age</b>                         |                     |
| ≤ 50 yrs                           | 8 (26.7)            |
| > 50 yrs                           | 19 (63.3)           |
| Unknown                            | 3 (10.0)            |
| <b>Size</b>                        |                     |
| ≤ 2 cm                             | 10 (33.3)           |
| > 2 cm                             | 9 (30.0)            |
| Unknown                            | 11 (36.7)           |
| <b>Grade</b>                       |                     |
| 1 & 2                              | 13 (43.3)           |
| 3                                  | 13 (43.3)           |
| Unknown                            | 4 (13.4)            |
| <b>ER Status</b>                   |                     |
| Negative                           | 6 (20.0)            |
| Positive                           | 21 (70.0)           |
| Unknown                            | 3 (10.0)            |
| <b>Nodal Status</b>                |                     |
| Negative                           | 13 (43.3)           |
| Positive                           | 7 (23.3)            |
| Unknown                            | 10 (33.3)           |
| <b>Histology</b>                   |                     |
| Ductal                             | 21 (70.0)           |
| Lobular                            | 4 (13.3)            |
| Ductal&Lobular                     | 1 (3.3)             |
| Unknown                            | 4 (13.3)            |
