# Supplementary material for: ADAM8 expression in invasive breast cancer promotes tumor dissemination and metastasis
Source: PubMed Central journal article supplement (PMC3927960; doi:10.1002/emmm.201303373), 2013-12-27
Supplement: emmm0006-0278-sd14.pdf [file emmm0006-0278-sd14.pdf]

**Supplementary Table S4.** Clinical characteristics of the primary and metastatic breast tumors assayed for ADAM8 protein expression by immunohistochemistry, including 37 Ductal Carcinoma *In situ* (DCIS), 50 Triple-Negative Breast Cancers (TNBCs) and 56 metastases (corresponding to Figure 1E). N(%) is shown.

| <b><i>Tumor characteristic</i></b> | <b><i>DCIS</i></b> | <b><i>TNBC</i></b> | <b><i>Metastasis</i></b> |
|------------------------------------|--------------------|--------------------|--------------------------|
| <b>Age</b>                         |                    |                    |                          |
| ≤ 50 yrs                           | 12 (32.4)          | 13 (26.0)          | 0                        |
| > 50 yrs                           | 25 (67.6)          | 37 (74.0)          | 0                        |
| Unknown                            | 0                  | 0                  | 56 (100.0)               |
| <b>Grade</b>                       |                    |                    |                          |
| 1 & 2                              | 0                  | 14 (28.0)          | 4 (7.1)                  |
| 3                                  | 0                  | 35 (70.0)          | 9 (16.1)                 |
| Unknown                            | 37 (100.0)         | 1 (2.0)            | 43 (76.8)                |
| <b>ER Status</b>                   |                    |                    |                          |
| Negative                           | 0                  | 50 (100.0)         | 6 (10.7)                 |
| Positive                           | 0                  | 0                  | 7 (12.5)                 |
| Unknown                            | 37 (100.0)         | 0                  | 43 (76.8)                |
| <b>HER2 Status</b>                 |                    |                    |                          |
| Negative                           | 0                  | 50 (100.0)         | 8 (14.3)                 |
| Positive                           | 0                  | 0                  | 5 (8.9)                  |
| Unknown                            | 37 (100.0)         | 0                  | 43 (76.8)                |
| <b>Nodal Status</b>                |                    |                    |                          |
| Negative                           | 0                  | 33 (66.0)          | 6 (10.7)                 |
| Positive                           | 0                  | 16 (32.0)          | 5 (8.9)                  |
| Unknown                            | 37 (100.0)         | 1 (2.0)            | 45 (80.4)                |
| <b>Histology</b>                   |                    |                    |                          |
| Ductal                             | 37 (100.0)         | 44 (88.0)          | 12 (21.4)                |
| Lobular                            | 0                  | 3 (6.0)            | 1 (1.8)                  |
| Others                             | 0                  | 3 (6.0)            | 0                        |
| Unknown                            | 0                  | 0                  | 43 (76.8)                |
