# Supplementary material for: ADAM8 expression in invasive breast cancer promotes tumor dissemination and metastasis
Source: PubMed Central journal article supplement (PMC3927960; doi:10.1002/emmm.201303373), 2013-12-27
Supplement: emmm0006-0278-sd16.pdf [file emmm0006-0278-sd16.pdf]

## SUPPLEMENTARY INFORMATION

***“ADAM8 expression in invasive breast cancer promotes tumor dissemination and metastasis” by Romagnoli et al.***

### **Supplementary Figures:**

**Supplementary Fig S1.** *ADAM8* mRNA levels correlate with clinicopathological variables of human breast tumors.

**Supplementary Fig S2.** ADAM8 proform is induced in Hs578T cells grown in 3D-cultures, which co-migrates with the one seen in MDA-MB-231 cells.

**Supplementary Fig S3.** Ectopic ADAM8 expression rescues the invasive phenotype of stable ADAM8 knockdown cells.

**Supplementary Fig S4.** ADAM8 knockdown tumors fail to grow beyond a palpable size and are poorly vascularized in a mammary fat pad mouse model.

**Supplementary Fig S5.** HIF-1 $\alpha$  is induced in breast cancer cell lines under hypoxia.

**Supplementary Fig S6.** Ectopic expression of full-length ADAM8 and remnant form in stable ADAM8 knockdown cells.

**Supplementary Fig S7.** siRNA-mediated knockdown of ADAM8 in MDA-MB-231 cells reduces their ability to adhere to and transmigrate through HUVECs.

**Supplementary Fig S8.** ADAM8 is not detected in HUVECs.

**Supplementary Fig S9.** Anti-ADAM8 antibody inhibits the metalloprotease activity of ADAM8.

**Supplementary Fig S10.** *VEGF-A* mRNA levels are unchanged in stable ADAM8 knockdown cells.

### **Supplementary Tables:**

**Supplementary Table S1.** Multivariate analysis of *ADAM8* mRNA as a predictor in breast cancer.

**Supplementary Table S2.** Clinical characteristics of the human primary breast tumors analyzed by ADAM8 ELISA.

**Supplementary Table S3.** Clinical characteristics of the sera from breast cancer patients analyzed by ADAM8 ELISA.

**Supplementary Table S4.** Clinical characteristics of the primary and metastatic samples from breast cancer patients analyzed for ADAM8 by immunohistochemistry.

### **Supplementary Methods:**

**Cell Lines and Culture Conditions**

**Western blotting**

**ATP assay**

**Soft agar and Matrigel outgrowth assays**

**Migration/invasion and transendothelial migration assays**

**Tube formation assay**

**ADAM8 metalloproteinase activity assay**

**Detection of CTCs**

### **References**
